# Supplementary material
Source: ML conference proceedings conference paper supplement (https://proceedings.neurips.cc/paper_files/paper/2008/hash/bd686fd640be98efaae0091fa301e613-Abstract.html)
Supplement: Supplementary file 1 [file bd686fd640be98efaae0091fa301e613-Supplemental.zip]

## A Fenchel duality

Consider the optimization problem

$$\inf_{\mathbf{w} \in S} \left( f(\mathbf{w}) + \sum_{t=1}^T g_t(\mathbf{w}) \right) .$$

An equivalent problem is

$$\inf_{\mathbf{w}_0, \mathbf{w}_1, \dots, \mathbf{w}_T} \left( f(\mathbf{w}_0) + \sum_{t=1}^T g_t(\mathbf{w}_t) \right) \text{ s.t. } \mathbf{w}_0 \in S \text{ and } \forall t \in [T], \mathbf{w}_t = \mathbf{w}_0 . \quad (18)$$

Introducing  $T$  vectors  $\lambda_1, \dots, \lambda_T$ , each  $\lambda_t \in \mathbb{R}^n$  is a vector of Lagrange multipliers for the equality constraint  $\mathbf{w}_t = \mathbf{w}_0$ , we obtain the following Lagrangian

$$\mathcal{L}(\mathbf{w}_0, \mathbf{w}_1, \dots, \mathbf{w}_T, \lambda_1, \dots, \lambda_T) = f(\mathbf{w}_0) + \sum_{t=1}^T g_t(\mathbf{w}_t) + \sum_{t=1}^T \langle \lambda_t, \mathbf{w}_0 - \mathbf{w}_t \rangle .$$

The dual problem is the task of maximizing the following dual objective value,

$$\begin{aligned} \mathcal{D}(\lambda_1, \dots, \lambda_T) &= \inf_{\mathbf{w}_0 \in S, \mathbf{w}_1, \dots, \mathbf{w}_T} \mathcal{L}(\mathbf{w}_0, \mathbf{w}_1, \dots, \mathbf{w}_T, \lambda_1, \dots, \lambda_T) \\ &= - \sup_{\mathbf{w}_0 \in S} \left( \left\langle \mathbf{w}_0, - \sum_{t=1}^T \lambda_t \right\rangle - f(\mathbf{w}_0) \right) - \sum_{t=1}^T \sup_{\mathbf{w}_t} (\langle \mathbf{w}_t, \lambda_t \rangle - g_t(\mathbf{w}_t)) \\ &= -f^* \left( - \sum_{t=1}^T \lambda_t \right) - \sum_{t=1}^T g_t^*(\lambda_t) , \end{aligned}$$

where  $f^*, g_1^*, \dots, g_T^*$  are the Fenchel conjugate functions of  $f, g_1, \dots, g_T$ . Therefore, the generalized Fenchel dual problem is

$$\sup_{\lambda_1, \dots, \lambda_T} -f^* \left( - \sum_{t=1}^T \lambda_t \right) - \sum_{t=1}^T g_t^*(\lambda_t) . \quad (19)$$

Note that when  $T = 1$  the above duality is the so-called Fenchel duality [Borwein and Lewis, 2006].

The weak duality theorem tells us that the primal objective upper bounds the dual objective:

$$\sup_{\lambda_1, \dots, \lambda_T} -f^* \left( - \sum_{t=1}^T \lambda_t \right) - \sum_{t=1}^T g_t^*(\lambda_t) \leq \inf_{\mathbf{w} \in S} f(\mathbf{w}) + \sum_{t=1}^T g_t(\mathbf{w}) .$$

A sufficient condition for equality to hold (i.e. strong duality) is that  $f$  is a strongly convex function,  $g_1, \dots, g_T$  are convex functions, and the intersection of the domains of  $g_1, \dots, g_T$  is polyhedral.

Assume that strong duality holds, let  $(\lambda_1, \dots, \lambda_T)$  be a maximizer of the dual objective function, and let  $(\mathbf{w}_0^*, \dots, \mathbf{w}_T^*)$  be a maximizer of the problem given in Eq. (18). Then, optimality conditions imply that

$$(\mathbf{w}_0^*, \dots, \mathbf{w}_T^*) = \operatorname{argmin}_{\mathbf{w}_0, \dots, \mathbf{w}_T} \mathcal{L}(\mathbf{w}_0, \dots, \mathbf{w}_T, \lambda_1, \dots, \lambda_T) .$$

See for example Boyd and Vandenberghe [2004] Section 5.5.2. In particular, the above implies that

$$\mathbf{w}_0^* = \operatorname{argmax}_{\mathbf{w}_0 \in S} \left\langle \mathbf{w}_0, - \sum_{t=1}^T \lambda_t \right\rangle - f(\mathbf{w}_0) = \nabla f^*(-\lambda_{1:T}) ,$$

where in the last equality we used Lemma 1. Since  $\mathbf{w}_0^*$  is also a minimizer of our original problem, we obtain the primal-dual link function

$$\mathbf{w} = \nabla f^*(-\lambda_{1:T}) .$$

## B Proof of Thm. 2

We first use the following properties of the Fenchel conjugate of strongly convex functions. The proof of this lemma follows from Lemma 18 in Shalev-Shwartz [2007].

**Lemma 3** *Let  $f$  be a  $\sigma$ -strongly convex function over  $S$  with respect to a norm  $\|\cdot\|$ . Let  $f^*$  be the Fenchel conjugate of  $f$ . Then,  $f^*$  is differentiable and for all  $\theta_1, \theta_2 \in \mathbb{R}^n$ , we have*

$$f^*(\theta_1 + \theta_2) - f^*(\theta_1) \leq \langle \nabla f^*(\theta_1), \theta_2 \rangle + \frac{1}{2\sigma} \|\theta_2\|_*^2$$

We also need the following technical lemma.

**Lemma 4** *Assume  $f$  strongly convex, let  $a, b \geq 0$ , and let  $\mathbf{w}_b = \nabla f^*(\theta/b)$ . Then,*

$$af^*(\theta/a) - bf^*(\theta/b) \geq (b-a)f(\mathbf{w})$$

**Proof** Since  $f$  is strongly convex we know that  $f^*$  is differentiable. Using Lemma 1 we have

$$f^*(\theta/b) = \langle \mathbf{w}_b, \theta/b \rangle - f(\mathbf{w}_b)$$

The definition of  $f^*$  now implies that

$$f^*(\theta/a) = \max_{\mathbf{w}} \langle \mathbf{w}, \theta/a \rangle - f(\mathbf{w}) \geq \langle \mathbf{w}_b, \theta/a \rangle - f(\mathbf{w}_b)$$

Therefore,

$$af^*(\theta/a) - bf^*(\theta/b) \geq -(a-b)f(\mathbf{w}_b)$$

which concludes our proof.  $\blacksquare$

Next, we show that the gradient descend update rule yields a sufficient increase of the dual objective.

**Lemma 5** *Let  $(\lambda_1, \dots, \lambda_{t-1})$  be an arbitrary sequence of vectors. Denote  $\mathbf{w} = \nabla f^*\left(-\frac{1}{\sigma_{1:t}}\lambda_{1:(t-1)}\right)$  and let  $\lambda \in \partial g_t(\mathbf{w})$ . Then,*

$$\mathcal{D}_{t+1}(\lambda_1, \dots, \lambda_{t-1}, \lambda) - \mathcal{D}_t(\lambda_1, \dots, \lambda_{t-1}) \geq \ell_t(\mathbf{w}) - \frac{\|\lambda\|_*^2}{2\sigma_{1:t}}.$$

**Proof** Denote  $\bar{\Delta}_t = \mathcal{D}_{t+1}(\lambda_1, \dots, \lambda_{t-1}, \lambda) - \mathcal{D}_t(\lambda_1, \dots, \lambda_{t-1})$ . Since  $f$  is strongly convex we can apply Lemma 3 to get that

$$\begin{aligned} \bar{\Delta}_t &= -\sigma_{1:t}f^*\left(-\frac{\lambda_{1:(t-1)}+\lambda}{\sigma_{1:t}}\right) + \sigma_{1:(t-1)}f^*\left(-\frac{\lambda_{1:(t-1)}}{\sigma_{1:(t-1)}}\right) - g_t^*(\lambda) \\ &\geq -\sigma_{1:t}\left(f^*\left(-\frac{\lambda_{1:(t-1)}}{\sigma_{1:t}}\right) - \frac{\langle \mathbf{w}, \lambda \rangle}{\sigma_{1:t}} + \frac{\|\lambda\|_*^2}{2(\sigma_{1:t})^2}\right) + \sigma_{1:(t-1)}f^*\left(-\frac{\lambda_{1:(t-1)}}{\sigma_{1:(t-1)}}\right) - g_t^*(\lambda) \\ &= \underbrace{\sigma_{1:(t-1)}f^*\left(-\frac{\lambda_{1:(t-1)}}{\sigma_{1:(t-1)}}\right) - \sigma_{1:t}f^*\left(-\frac{\lambda_{1:(t-1)}}{\sigma_{1:t}}\right)}_A + \underbrace{\langle \mathbf{w}, \lambda \rangle - g_t^*(\lambda)}_B - \frac{\|\lambda\|_*^2}{2\sigma_{1:t}}. \end{aligned}$$

Since  $\lambda \in \partial g_t(\mathbf{w})$  we get from Lemma 1 that  $B = g_t(\mathbf{w})$ . Next, we use Lemma 4 and the definition of  $\mathbf{w}$  to get that  $A \geq (\sigma_{1:t} - \sigma_{1:(t-1)})f(\mathbf{w}) = \sigma_t f(\mathbf{w})$ . Thus,  $A + B \geq \sigma_t f(\mathbf{w}) + g_t(\mathbf{w}) = \ell_t(\mathbf{w})$  and this concludes our proof.  $\blacksquare$

The proof of Thm. 2 now easily follows.

**Proof** [of Thm. 2] Denote  $\Delta_t = \mathcal{D}_{t+1}(\lambda_1^{t+1}, \dots, \lambda_t^{t+1}) - \mathcal{D}_t(\lambda_1^t, \dots, \lambda_{t-1}^t)$  and note that Eq. (10) still holds. The definition of the update in Fig. 3 and Lemma 5 implies that there exists  $\mathbf{v}_t \in \partial g_t(\mathbf{w}_t)$  such that  $\Delta_t \geq \ell_t(\mathbf{w}_t) - \frac{\|\mathbf{v}_t\|_*^2}{2\sigma_{1:t}}$ . Summing over  $t$  and combining with Eq. (10) we conclude our proof.  $\blacksquare$
